# Supplementary material
Source: Springer Nature journal article supplement (https://www.springermedizin.de/resource/supplementary/12875_2013_919_MOESM4_ESM.pdf/9435396)
Supplement: MOESM4 [file 9435396]

**Table 3: Principal Diagnoses<sup>1</sup>**

| Diagnoses                                | Total            | Residents        | Non-Residents    | Given Antibiotics | Diagnostic Uncertainty |
|------------------------------------------|------------------|------------------|------------------|-------------------|------------------------|
|                                          | <b>N (%)</b>     |                  |                  |                   |                        |
| <b><i>Antibiotic-appropriate</i></b>     |                  |                  |                  |                   |                        |
| Sinusitis                                | 99 (10)          | 28 (7)           | 71 (13)          | 77 (78)           | 19 (19)                |
| Pneumonia                                | 74 (8)           | 32 (8)           | 42 (7)           | 51 (69)           | 36 (49)                |
| Streptococcal pharyngitis                | 69 (7)           | 26 (7)           | 43 (8)           | 27 (39)           | 49 (71)                |
| Otitis media                             | 16 (2)           | 6 (2)            | 10 (2)           | 13 (81)           | 1 (6)                  |
| Bacterial infection <sup>2</sup>         | 10 (1)           | 3 (1)            | 7 (1)            | 6 (60)            | 8 (80)                 |
| Pertussis                                | 9 (1)            | 4 (1)            | 5 (1)            | 6 (67)            | 6 (67)                 |
| <b><i>Subtotal</i></b>                   | <b>277 (29)</b>  | <b>99 (25)</b>   | <b>178 (32)</b>  | <b>180 (65)</b>   | <b>119 (43)</b>        |
| <b><i>Non-antibiotic-appropriate</i></b> |                  |                  |                  |                   |                        |
| Upper respiratory infection              | 445 (46)         | 192 (48)         | 253 (45)         | 14 (3)            | 12 (3)                 |
| Acute bronchitis                         | 90 (9)           | 34 (9)           | 56 (10)          | 13 (14)           | 4 (4)                  |
| Post-nasal drip                          | 33 (3)           | 15 (4)           | 18 (3)           | 1 (3)             | 3 (9)                  |
| Non-streptococcal pharyngitis            | 33 (3)           | 18 (5)           | 15 (3)           | 0 (0)             | 5 (15)                 |
| Allergies                                | 32 (3)           | 17 (4)           | 15 (3)           | 0 (0)             | 1 (3)                  |
| Reactive airway disease                  | 5 (1)            | 1 (0)            | 4 (1)            | 0 (0)             | 1 (20)                 |
| Other <sup>3</sup>                       | 47 (5)           | 23 (6)           | 24 (4)           | 2 (4)             | 6 (13)                 |
| <b><i>Subtotal</i></b>                   | <b>685 (71)</b>  | <b>300 (75)</b>  | <b>385 (68)</b>  | <b>29 (4)</b>     | <b>32 (5)</b>          |
| <b>Total</b>                             | <b>962 (100)</b> | <b>399 (100)</b> | <b>563 (100)</b> | <b>209 (22)</b>   | <b>151 (16)</b>        |

<sup>1</sup> Total, Resident, and Non-Resident percentages are column percents. Given Antibiotics and Diagnostic Uncertainty are row percents. Percentages may not add up because of rounding.

<sup>2</sup> "Bacterial infection" was most often written as "bacterial superinfection."

<sup>3</sup> "Other" includes diagnoses that were listed 5 times or fewer, or that listed "cough" as a diagnosis. The most common other diagnoses were "cough" (16), influenza (4), and gastroesophageal reflux disease (3).
